# Supplementary material for: Chloroquine use in the Treatment of COVID-19: Systems Biology Report of Common Targets of SARS-CoV-2 and Chloroquine.
Source: Research Square preprint supplement (doi:10.21203/rs.3.rs-99139/v1), 2020-11-03
Supplement: Supplementary file 1 [file 0d424ab98cbb53e618655f47.docx]

**Supplementary Table S2**

**Intersection nodes of Chloroquine and COVID-19 networks.**

The listed are 266 nodes that are common for the networks formed by chloroquine and COVID-19. The rows from 3 to 266 show the nodes of COVID-19 network, and the last 2 rows annotate ACE2/TMPRSS2 common nodes, ALB and YWHAZ.

| Common nodes of Chloroquine and Covid19 networks | |  |
| --- | --- | --- |
| Accession number | Name | Human Label |
| P09429 | High mobility group box 1 | HMGB1 |
| P12004 | Proliferating cell nuclear antigen | PCNA |
| Q9Y3U8 | Ribosomal protein L36 | RPL36 |
| Q9Y2W1 | Thyroid hormone receptor associated protein 3 | THRAP3 |
| Q9NYF8 | BCL2 associated transcription factor 1 | BCLAF1 |
| Q9H307 | Pinin, desmosome associated protein | PNN |
| Q8NEJ9 | Neuroguidin | NGDN |
| Q86VM9 | Zinc finger CCCH-type containing 18 | ZC3H18 |
| Q6PKG0 | La ribonucleoprotein 1, translational regulator | LARP1 |
| Q15287 | RNA binding protein with serine rich domain 1 | RNPS1 |
| Q13573 | SNW domain containing 1 | SNW1 |
| Q09161 | Nuclear cap binding protein subunit 1 | NCBP1 |
| P62913 | Ribosomal protein L11 | RPL11 |
| P62753 | Ribosomal protein S6 kinase B1 | RPS6 |
| P62424 | Ribosomal protein L7A | RPL7A |
| P38919 | Eukaryotic translation initiation factor 4A3 | EIF4A3 |
| P23396 | Ribosomal protein S3 | RPS3 |
| P19338 | Nucleolin | NCL |
| Q07021 | Complement C1q binding protein | C1QBP |
| P42858 | Huntingtin | HTT |
| P12682 | High mobility group box 1 | HMGB1 |
| Q9QUN7 | Toll like receptor 2 | Tlr2 |
| P63158 | High mobility group box 1 | Hmgb1 |
| O00206 | Toll like receptor 4 | TLR4 |
| Q9QUK6 | Toll like receptor 4 | Tlr4 |
| Q8TDQ0 | Hepatitis A virus cellular receptor 2 | HAVCR2 |
| P43405 | Spleen associated tyrosine kinase | SYK |
| Q9NP31 | SH2 domain containing 2A | SH2D2A |
| P60484 | Phosphatase and tensin homolog | PTEN |
| CHEBI:16755 |  | CHEBI:16755 |
| P22366 | MYD88 innate immune signal transduction adaptor | Myd88 |
| O60260 | Parkin RBR E3 ubiquitin protein ligase | PRKN |
| Q7Z434 | Mitochondrial antiviral signaling protein | MAVS |
| O95786 | DExD/H-box helicase 58 | DDX58 |
| Q9BYX4 | Interferon induced with helicase C domain 1 | IFIH1 |
| O15111 | Component of inhibitor of nuclear factor kappa B kinase complex | CHUK |
| O14920 | Inhibitor of nuclear factor kappa B kinase subunit beta | IKBKB |
| P35637 | FUS RNA binding protein | FUS |
| Q08211 | DExH-box helicase 9 | DHX9 |
| P10636-8 | Microtubule associated protein tau | MAPT |
| EBI-14348029 |  | EBI-14348029 |
| Q05127 | Polymerase complex protein | VP35 |
| Q9HCE5 | Methyltransferase like 14 | METTL14 |
| Q9R1S0 | B9 domain containing 1 | B9d1 |
| P55085 | F2R like trypsin receptor 1 | F2RL1 |
| Q9UBU9 | Nuclear RNA export factor 1 | NXF1 |
| Q28141 | DExH-box helicase 9 | DHX9 |
| P61286 | Poly(A) binding protein cytoplasmic 1 | PABPC1 |
| Q9QXM1 | Junction mediating and regulatory protein, p53 cofactor | JMY |
| P07602 | Prosaposin | PSAP |
| Q14164 | Inhibitor of nuclear factor kappa B kinase subunit epsilon | IKBKE |
| P04487 | Tegument protein US11 [Human alphaherpesvirus 1 | US11 |
| Q9H7S9 | Zinc finger protein 703 | ZNF703 |
| F1BA49 | B303_sSgp2 nonstructural protein [ SFTS virus HB29 ] | F1BA49 |
| O75569 | Protein activator of interferon induced protein kinase EIF2AK2 | PRKRA |
| Q9UHD2 | TANK binding kinase 1 | TBK1 |
| Q9NZ43 | Unconventional SNARE in the ER 1 | USE1 |
| Q86U44 | Methyltransferase like 3 | METTL3 |
| O00571 | DEAD-box helicase 3 X-linked | DDX3X |
| O35658 | Complement C1q binding protein | C1qbp |
| Q9NVI7 | ATPase family AAA domain containing 3A | ATAD3A |
| Q5T9A4 | ATPase family AAA domain containing 3B | ATAD3B |
| O14730 | RIO kinase 3 | RIOK3 |
| O14672 | ADAM metallopeptidase domain 10 | ADAM10 |
| P49768 | Presenilin 1 | PSEN1 |
| P05067-PRO_0000000092 | Amyloid beta precursor protein | APP |
| Q8N6Q3 | CD177 | CD177 |
| P05067-8 | Amyloid beta precursor protein | APP |
| P49755 | Transmembrane p24 trafficking protein 10 | TMED10 |
| Q8N766 | ER membrane protein complex subunit 1 | EMC1 |
| Q04637 | Eukaryotic translation initiation factor 4 gamma 1 | EIF4G1 |
| P54253 | Ataxin 1 | ATXN1 |
| Q923E4 | Sirtuin 1 | Sirt1 |
| P34902 | Interleukin 2 receptor subunit gamma | Il2rg |
| P07750 | Interleukin 4 | Il4 |
| Q9NQC3 | Reticulon 4 | RTN4 |
| Q16820 | Meprin A subunit beta | MEP1B |
| O00213 | Amyloid beta precursor protein binding family B member 1 | APBB1 |
| Q9Y6D5 | ADP ribosylation factor guanine nucleotide exchange factor 2 | ARFGEF2 |
| P19438 | TNF receptor superfamily member 1A | TNFRSF1A |
| Q9ULZ3 | PYD and CARD domain containing | PYCARD |
| Q13546 | Receptor interacting serine/threonine kinase 1 | RIPK1 |
| P48729 | Casein kinase 1 alpha 1 | CSNK1A1 |
| Q06A28 | Ribonucleoside-diphosphate reductase large subunit | RIR1 |
| Q60855 | Receptor interacting serine/threonine kinase 1 | Ripk1 |
| Q9Y6K9 | Inhibitor of nuclear factor kappa B kinase regulatory subunit gamma | IKBKG |
| O70343 | PPARG coactivator 1 alpha | Ppargc1a |
| Q9UBK2 | PPARG coactivator 1 alpha | PPARGC1A |
| Q9DBR0 | A-kinase anchoring protein 8 | Akap8 |
| P25799 | Nuclear factor kappa B subunit 1 | Nfkb1 |
| O43823 | A-kinase anchoring protein 8 | AKAP8 |
| P42574 | Caspase 3 | CASP3 |
| Q12933 | TNF receptor associated factor 2 | TRAF2 |
| Q9UQ80 | Proliferation-associated 2G4 | PA2G4 |
| Q92769 | Histone deacetylase 2 | HDAC2 |
| Q9Z2D8 | Methyl-CpG binding domain protein 3 | Mbd3 |
| Q6NYC1 | Jumonji domain containing 6, arginine demethylase and lysine hydroxylase | JMJD6 |
| P04156 | Prion protein | PRNP |
| Q06124 | Protein tyrosine phosphatase non-receptor type 11 | PTPN11 |
| Q01101 | INSM transcriptional repressor 1 | INSM1 |
| O88895 | Histone deacetylase 3 | Hdac3 |
| P25322 | Cyclin D1 | Ccnd1 |
| P70288 | Histone deacetylase 2 | Hdac2 |
| E9QAG8 | Zinc finger protein 431 | Znf431 |
| Q2HR82 |  | K8 |
| Q13547 | Histone deacetylase 1 | HDAC1 |
| Q9UL18 | Argonaute RISC component 1 | AGO1 |
| Q9UKV8 | Argonaute RISC catalytic component 2 | AGO2 |
| P29317 | EPH receptor A2 | EPHA2 |
| Q8IUC6 | Toll like receptor adaptor molecule 1 | TICAM1 |
| Q9UI95 | Mitotic arrest deficient 2 like 2 | MAD2L2 |
| Q3URK3 | TET methylcytosine dioxygenase 1 | Tet1 |
| P09651 | Heterogeneous nuclear ribonucleoprotein A1 | HNRNPA1 |
| O75376 | Nuclear receptor corepressor 1 | NCOR1 |
| O75469 | Nuclear receptor subfamily 1 group I member 2 | NR1I2 |
| Q96EB6 | Sirtuin 1 | SIRT1 |
| Q15831 | Serine/threonine kinase 11 | STK11 |
| Q09472 | E1A binding protein p300 | EP300 |
| Q9Z0Y9 | Nuclear receptor subfamily 1 group H member 3 | Nr1h3 |
| Q60644 | Nuclear receptor subfamily 1 group H member 2 | Nr1h2 |
| P06400 | RB transcriptional corepressor 1, pRb | RB1 |
| Q99417 | MYC binding protein | MYCBP |
| P31323 | Protein kinase cAMP-dependent type II regulatory subunit beta | PRKAR2B |
| Q8R4A3 | Dishevelled binding antagonist of beta catenin 1 | Dact1 |
| Q7TN08 | Dishevelled binding antagonist of beta catenin 2 | Dact2 |
| O70237 | Growth factor independent 1B transcriptional repressor | Gfi1b |
| P70338 | Growth factor independent 1 transcriptional repressor | Gfi1 |
| O43463 | Suppressor of variegation 3-9 homolog 1 | SUV39H1 |
| Q9UIS9 | Methyl-CpG binding domain protein 1 | MBD1 |
| P68400 | Casein kinase 2 alpha 1 | CSNK2A1 |
| Q9ERZ6 | Fidgetin, microtubule severing factor | Fign |
| P17612 | Protein kinase cAMP-activated catalytic subunit alpha | PRKACA |
| Q61656 | DExD/H-box helicase 58 | Ddx5 |
| Q63014 | A-kinase anchoring protein 8 | Akap8 |
| Q15418 | Ribosomal protein S6 kinase A1 | RPS6KA1 |
| P18653 | Ribosomal protein S6 kinase A1 | Rps6ka1 |
| P42574-PRO_0000004572 | Caspase 3 | CASP3 |
| P42574-PRO_0000004571 | Caspase 3 | CASP3 |
| P49736 | Minichromosome maintenance complex component 2 | MCM2 |
| O15379 | Histone deacetylase 3 | HDAC3 |
| Q9ULX6 | A-kinase anchoring protein 8 like | AKAP8L |
| Q96GD4 | Aurora kinase B | AURKB |
| Q9Y618 | Nuclear receptor corepressor 2 | NCOR2 |
| P78371 | Chaperonin containing TCP1 subunit 2 | CCT2 |
| Q9P2S5 | WD repeat containing, antisense to TP73 | WRAP73 |
| Q9Y2D8 | SSX family member 2 interacting protein | SSX2IP |
| P13861 | Protein kinase cAMP-dependent type II regulatory subunit alpha | PRKAR2A |
| P24385 | Cyclin D1 | CCND1 |
| Q15021 | non-SMC condensin I complex subunit D2 | NCAPD2 |
| Q8CJG0 | Argonaute RISC catalytic component 2 | Ago2 |
| Q14964 | Member RAS oncogene family | RAB39A |
| Q8NFZ5 | TNFAIP3 interacting protein 2 | TNIP2 |
| Q8WV41 | Sorting nexin 33 | SNX33 |
| Q9Y5X1 | Sorting nexin 9 | SNX9 |
| P42680 | Tectorin alpha | TEC |
| P14598 | Neutrophil cytosolic factor 1 | NCF1 |
| Q96RF0 | Sorting nexin 18 | SNX18 |
| P22893 | ZFP36 ring finger protein like 1 | Zfp36 |
| P25963 | NFKB inhibitor alpha | NFKBIA |
| O75509 | TNF receptor superfamily member 21 | TNFRSF21 |
| Q9HCE1 | Mov10 RISC complex RNA helicase | MOV10 |
| P11940 | Poly(A) binding protein cytoplasmic 1 | PABPC1 |
| P50402 | Emerin | EMD |
| P52298 | Nuclear cap binding protein subunit 2 | NCBP2 |
| Q06265 | Exosome component 9 | EXOSC9 |
| Q96PU4 | Ubiquitin like with PHD and ring finger domains 2 | UHRF2 |
| P21926 | CD9 molecule, tetraspanin | CD9 |
| P78536 | ADAM metallopeptidase domain 17 | ADAM17 |
| P62079 | Tetraspanin 5 | TSPAN5 |
| O95858 | Tetraspanin 15 | TSPAN15 |
| P06756 | Integrin subunit alpha V | ITGAV |
| P05556 | Integrin subunit beta 1 | ITGB1 |
| O95859 | Tetraspanin 12 | TSPAN12 |
| Q9BY11 | Protein kinase C and casein kinase substrate in neurons 1 | PACSIN1 |
| Q9UNF0 | Protein kinase C and casein kinase substrate in neurons 2 | PACSIN2 |
| Q9UKS6 | Protein kinase C and casein kinase substrate in neurons 2 | PACSIN3 |
| P03129 | E7 transforming protein Human papillomavirus | E7 |
| Q8B5B5 | E7 transforming protein Human papillomavirus | E7 |
| Q07857 | E7 transforming protein Human papillomavirus | E7 |
| Q80901 | E7 transforming protein Human papillomavirus | E7 |
| Q6TY35 | E7 transforming protein Human papillomavirus | E7 |
| Q6TY28 | E7 transforming protein Human papillomavirus | E7 |
| Q80908 | E7 transforming protein Human papillomavirus | E7 |
| P50778 | E7 transforming protein Human papillomavirus | E7 |
| Q92985 | Interferon regulatory factor 7 | IRF7 |
| Q77M20 | Phosphoprotein, Measles virus strain Schwarz | P |
| Q77M19 | Phosphoprotein, Measles virus strain Schwarz | P |
| Q92900-2 | UPF1 RNA helicase and ATPase | UPF1 |
| P24772 | hypothetical protein VACWR196 [Vaccinia virus] | VACWR196 |
| Q9Y6Q9 | Nuclear receptor coactivator 3 | NCOA3 |
| Q92793 | CREB binding protein | CREBBP |
| Q13257 | Mitotic arrest deficient 2 like 1 | MAD2L1 |
| P46940 | IQ motif containing GTPase activating protein 1 | IQGAP1 |
| P42704 | Leucine rich pentatricopeptide repeat containing | LRPPRC |
| Q6PB66 | Leucine rich pentatricopeptide repeat containing | Lrpprc |
| Q9UKV0-7 | Histone deacetylase 9 | HDAC9 |
| Q9UKV0-3 | Histone deacetylase 9 | HDAC9 |
| P05067 | Amyloid Precursor Protein | APP |
| Q86SQ7 | SHH signaling and ciliogenesis regulator SDCCAG8 | SDCCAG8 |
| P10636 | Microtubule associated protein tau | MAPT |
| P08138 | Nerve growth factor receptor | NGFR |
| O95070 | Yip1 interacting factor homolog A, membrane trafficking protein | YIF1A |
| Q5BJF2 | Transmembrane protein 97 | TMEM97 |
| Q99720 | Sigma non-opioid intracellular receptor 1 | SIGMAR1 |
| P21964 | Catechol-O-methyltransferase | COMT |
| P35613 | Basigin (Ok blood group) | BSG |
| O88351 | Inhibitor of nuclear factor kappa B kinase subunit beta | Ikbkb |
| P14340 | Polyprotein, viral capsid? | P14340 |
| Q9H6S1 | 5-azacytidine induced 2 | AZI2 |
| P17362 | C6L hypothetical protein [ Vaccinia virus ] | VACWR022 |
| Q92844 | TRAF family member associated NFKB activator | TANK |
| Q9NZN8 | CCR4-NOT transcription complex subunit 2 | CNOT2 |
| Q13227 | G protein pathway suppressor 2 | GPS2 |
| P17020 | Zinc finger protein 16 | ZNF16 |
| P15090 | Fatty acid binding protein 4 | FABP4 |
| Q60680 | Component of inhibitor of nuclear factor kappa B kinase complex | Chuk |
| Q9Y5K5 | Ubiquitin C-terminal hydrolase L5 | UCHL5 |
| P48556 | Proteasome 26S subunit, non-ATPase 8 | PSMD8 |
| O60826 | Coiled-coil domain containing 22 | CCDC22 |
| Q14676 | Mediator of DNA damage checkpoint 1 | MDC1 |
| Q6ZNX1 | Shieldin complex subunit 3 | SHLD3 |
| P03372 | Estrogen receptor 1 | ESR1 |
| P10085 | Myogenic differentiation 1 | Myod1 |
| Q15363 | Transmembrane p24 trafficking protein 2 | TMED2 |
| P22681 | Cbl proto-oncogene | CBL |
| O88522 | Inhibitor of nuclear factor kappa B kinase regulatory subunit gamma | Ikbkg |
| Q92905 | COP9 signalosome subunit 5 | COPS5 |
| Q63645 | F2R like trypsin receptor 1 | F2rl1 |
| Q63524 | Transmembrane p24 trafficking protein 2 | Tmed2 |
| Q14868 | Homeodomain-like superfamily protein | EPR-1 |
| O43889-2 | cAMP responsive element binding protein 3 | CREB3 |
| Q92831 | Lysine acetyltransferase 2B | KAT2B |
| EBI-5261640 | Sirtuin 1 | Sirt1 |
| Q9QYK2 | PPARG coactivator 1 alpha | Ppargc1a |
| Q9NS37 | CREB/ATF bZIP transcription factor | CREBZF |
| Q04724 | TLE family member 1, transcriptional corepressor | TLE1 |
| P98078 | DAB adaptor protein 2 | Dab2 |
| Q14781 | Chromobox 2 | CBX2 |
| Q9HC52 | Chromobox 8 | CBX8 |
| Q12888 | Tumor protein p53 binding protein 1 | TP53BP1 |
| Q02241 | Kinesin family member 23 | KIF23 |
| Q92945 | KH-type splicing regulatory protein | KHSRP |
| P17813 | Endoglin | ENG |
| P19784 | Casein kinase 2 alpha 2 | CSNK2A2 |
| P26358 | DNA methyltransferase 1 | DNMT1 |
| O95905 | Ecdysoneless cell cycle regulator | ECD |
| A2AG06 | Meiosis specific with coiled-coil domain | Meioc |
| Q96RI1-2 | Nuclear receptor subfamily 1 group H member 4 | NR1H4 |
| P02786 | Transferrin receptor | TFRC |
| Q08431 | Milk fat globule EGF and factor V/VIII domain containing | MFGE8 |
| P61006 | RAB8A, member RAS oncogene family | RAB8A |
| Q8IVH8 | Mitogen-activated protein kinase kinase kinase kinase 3 | MAP4K3 |
| Q13443 | ADAM metallopeptidase domain 9 | ADAM9 |
| O94875 | Sorbin and SH3 domain containing 2 | SORBS2 |
| P13639 | Eukaryotic translation elongation factor 2 | EEF2 |
| P03206 | protein Zta [Human gammaherpesvirus 4 (Epstein-Barr virus)] | BZLF1 |
| Q8IZ52-2 | Chondroitin polymerizing factor | CHPF |
| O60346 | PH domain and leucine rich repeat protein phosphatase 1 | PHLPP1 |
| P62136 | Protein phosphatase 1 catalytic subunit alpha | PPP1CA |
| Q9JKL7 | Splicing regulatory glutamic acid and lysine rich protein 1 | Srek1 |
| Q99962 | SH3 domain containing GRB2 like 2, endophilin A1 | SH3GL2 |
| Q61072 | ADAM metallopeptidase domain 9 | Adam9 |
| Q99JB8 | Protein kinase C and casein kinase substrate in neurons 2 | Pacsin3 |
| Q62420 | SH3 domain containing GRB2 like 2, endophilin A1 | Sh3gl2 |
| Common nodes of ACE2/TPMRSS2 and chloroquine networks | |  |
| P02768 | Albumin | ALB |
| P63101 | 14-3-3-zeta, YWHAZ – tyrosine 3-monooxygenase/tryptophan 5-monooxygenase activation protein zeta | YWHAZ |
